# Supplementary material for: Acylamido-based anion-functionalized ionic liquids for efficient synthesis of poly(isosorbide carbonate)
Source: Royal Society of Chemistry journal article supplement (doi:10.1039/d1cy01824h), 2021-11-27
Supplement: d1cy01824h1.pdf [file d1cy01824h1.pdf]

# Electronic Supplementary Information

## Acylamido-based Anion-functionalized Ionic Liquids for Efficient Synthesis of Poly(isosorbide carbonate)

Wenjuan Fang,<sup>[a,b]</sup> Fei Xu,\*<sup>[a,c]</sup> Yaqin Zhang,<sup>[a]</sup> Heng Wang,<sup>[a]</sup> Zhencai Zhang,<sup>[a]</sup> Zifeng Yang,<sup>[a]</sup>

Weiwei Wang,<sup>[a]</sup> Hongyan He,<sup>[a,c]</sup> and Yunjun Luo\*<sup>[b]</sup>

**Table S1** The key abbreviations and symbols in the text

| No. | Full name                                            | Abbreviation or symbol     |
|-----|------------------------------------------------------|----------------------------|
| 1   | isosorbide                                           | ISB                        |
| 2   | dimethyl carbonate                                   | DMC                        |
| 3   | ionic liquid                                         | IL                         |
| 4   | polycarbonate                                        | PC                         |
| 5   | bisphenol A                                          | BPA                        |
| 6   | poly(isosorbide carbonate)                           | PIC                        |
| 7   | diphenyl carbonate                                   | DPC                        |
| 8   | density functional theory                            | DFT                        |
| 9   | natural population analysis                          | NPA                        |
| 10  | tetrabutylphosphonium hydroxide                      | [P <sub>4444</sub> ][OH]   |
| 11  | tetrabutylphosphonium phthalimide                    | [P <sub>4444</sub> ][Phth] |
| 12  | tetrabutylphosphonium 1,8-naphthalimide              | [P <sub>4444</sub> ][Naph] |
| 13  | tetrabutylphosphonium glutarimide                    | [P <sub>4444</sub> ][Glu]  |
| 14  | tetrabutylphosphonium 3,3-tetramethylene glutarimide | [P <sub>4444</sub> ][Tegl] |
| 15  | tetrabutylphosphonium 1,2-cyclopentane dicarboximide | [P <sub>4444</sub> ][Cydi] |
| 16  | tetrabutylphosphonium hexahydrophthalimide           | [P <sub>4444</sub> ][Heph] |
| 17  | tetrabutylphosphonium succinimide                    | [P <sub>4444</sub> ][Suc]  |
| 18  | hydroxy group                                        | -OH                        |
| 19  | carbonyl group                                       | C=O                        |
| 20  | acylamido group                                      | -N-C=O                     |
| 21  | carboxymethyl group                                  | -OC(O)OCH <sub>3</sub>     |
| 22  | methoxyl group                                       | -OCH <sub>3</sub>          |
| 23  | glass transition temperature                         | T <sub>g</sub>             |
| 24  | the weight average molecular weight                  | M <sub>w</sub>             |
| 25  | electron spray ionization mass spectrometry          | ESI-MS                     |
| 26  | thermogravimetric analysis                           | TGA                        |
| 27  | differential scanning calorimetry                    | DSC                        |
| 28  | temperature at 5% weight loss                        | T <sub>d-5%</sub>          |
| 29  | temperature at 95% weight loss                       | T <sub>d-95%</sub>         |

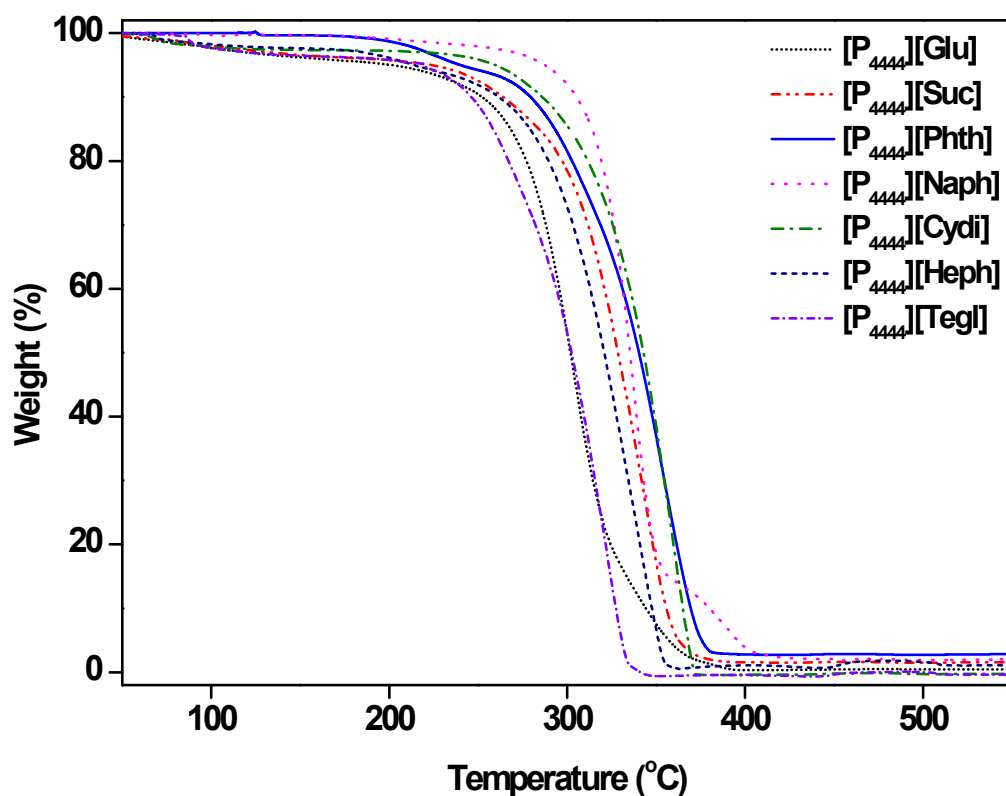

Fig. S1 TGA curves of acylamido-based ILs.

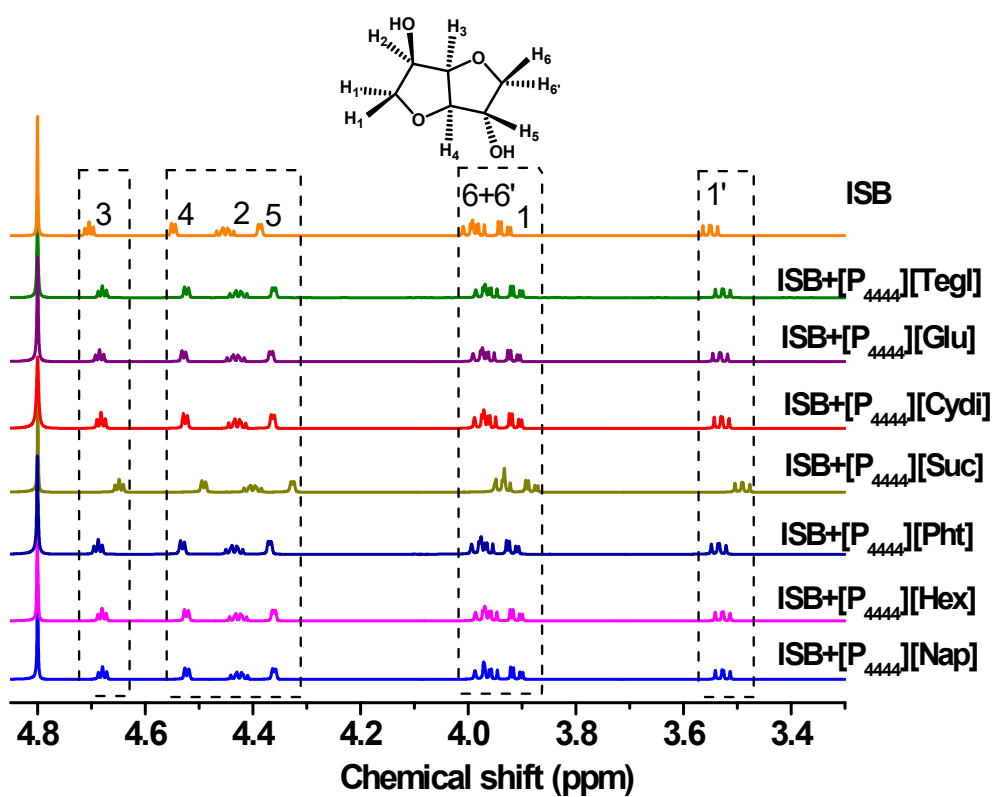

Fig. S2 <sup>1</sup>H NMR spectra of ISB after addition of different acylamido-based ILs.

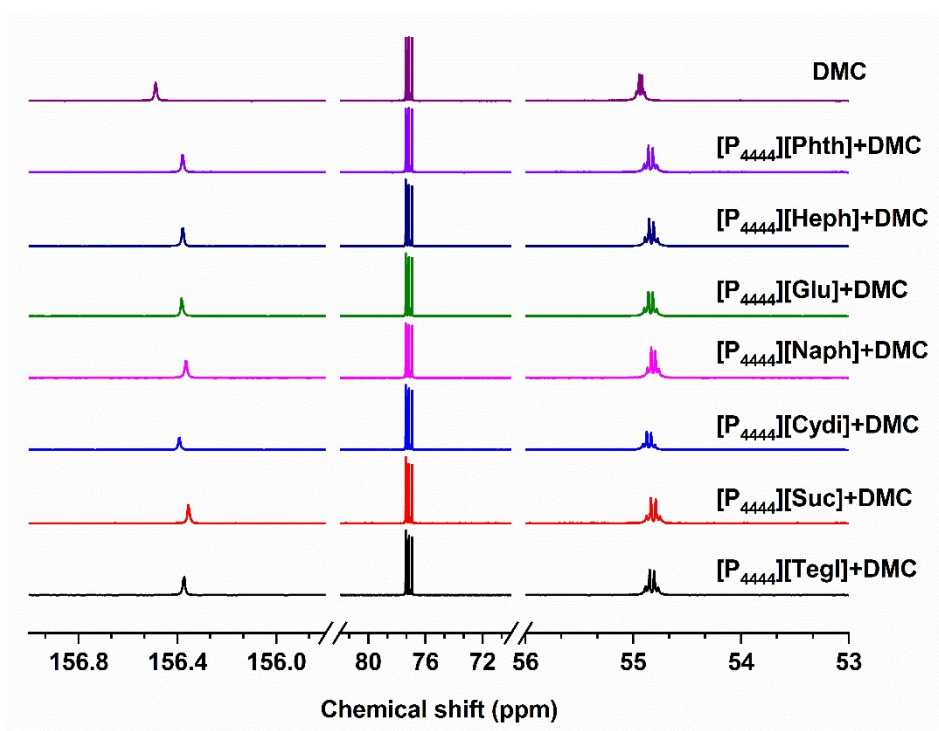

Fig. S3  $^{13}\text{C}$  NMR spectra of DMC after addition of different acylamido-based ILs.

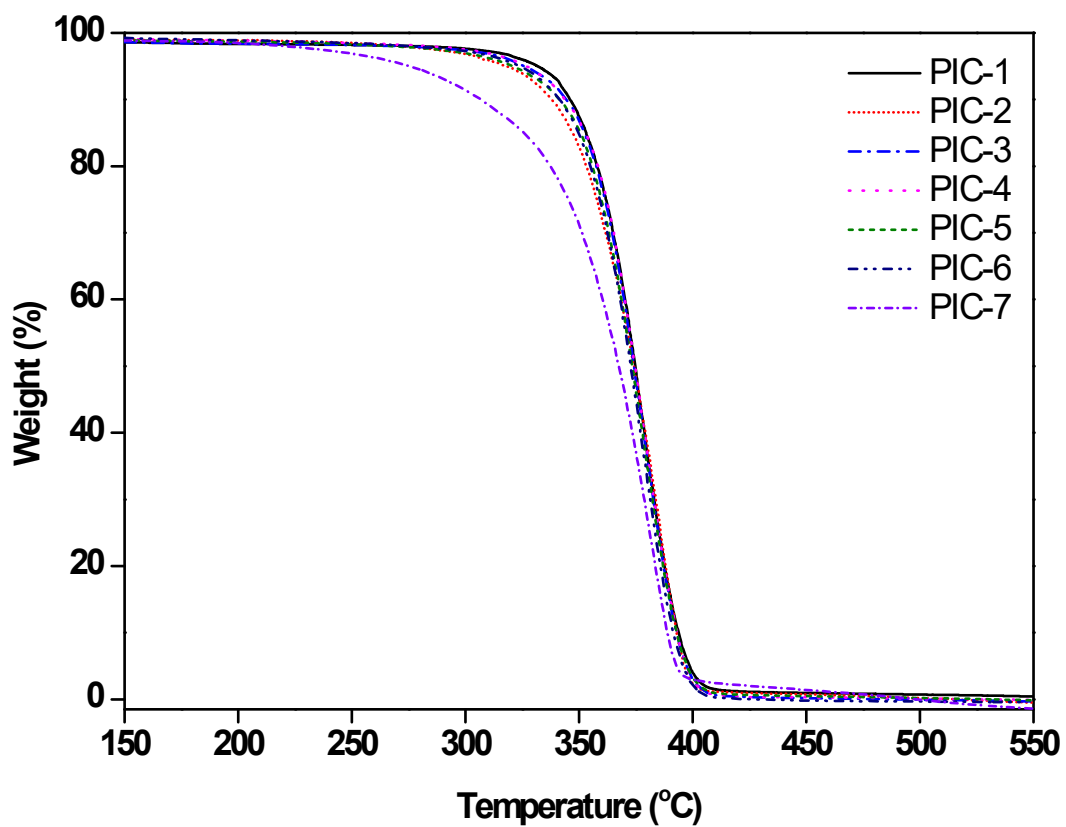

Fig. S4 TGA curves of PIC samples synthesized by acylamido-based ILs.

[P<sub>4444</sub>][Phth]: <sup>1</sup>H NMR (600 MHz, D<sub>2</sub>O): 7.49-7.60 (m, 4H), 2.14-2.19 (m, 8H), 1.44-1.59 (m, 16H), 0.94 (t, 12H); FT-IR (KBr, cm<sup>-1</sup>): 3058, 2960, 2931, 2870, 1679, 1584, 1564, 1495, 1467, 1397, 1295, 1140, 1093, 1003, 956, 924, 853, 819, 751, 722, 674, 639, 564.

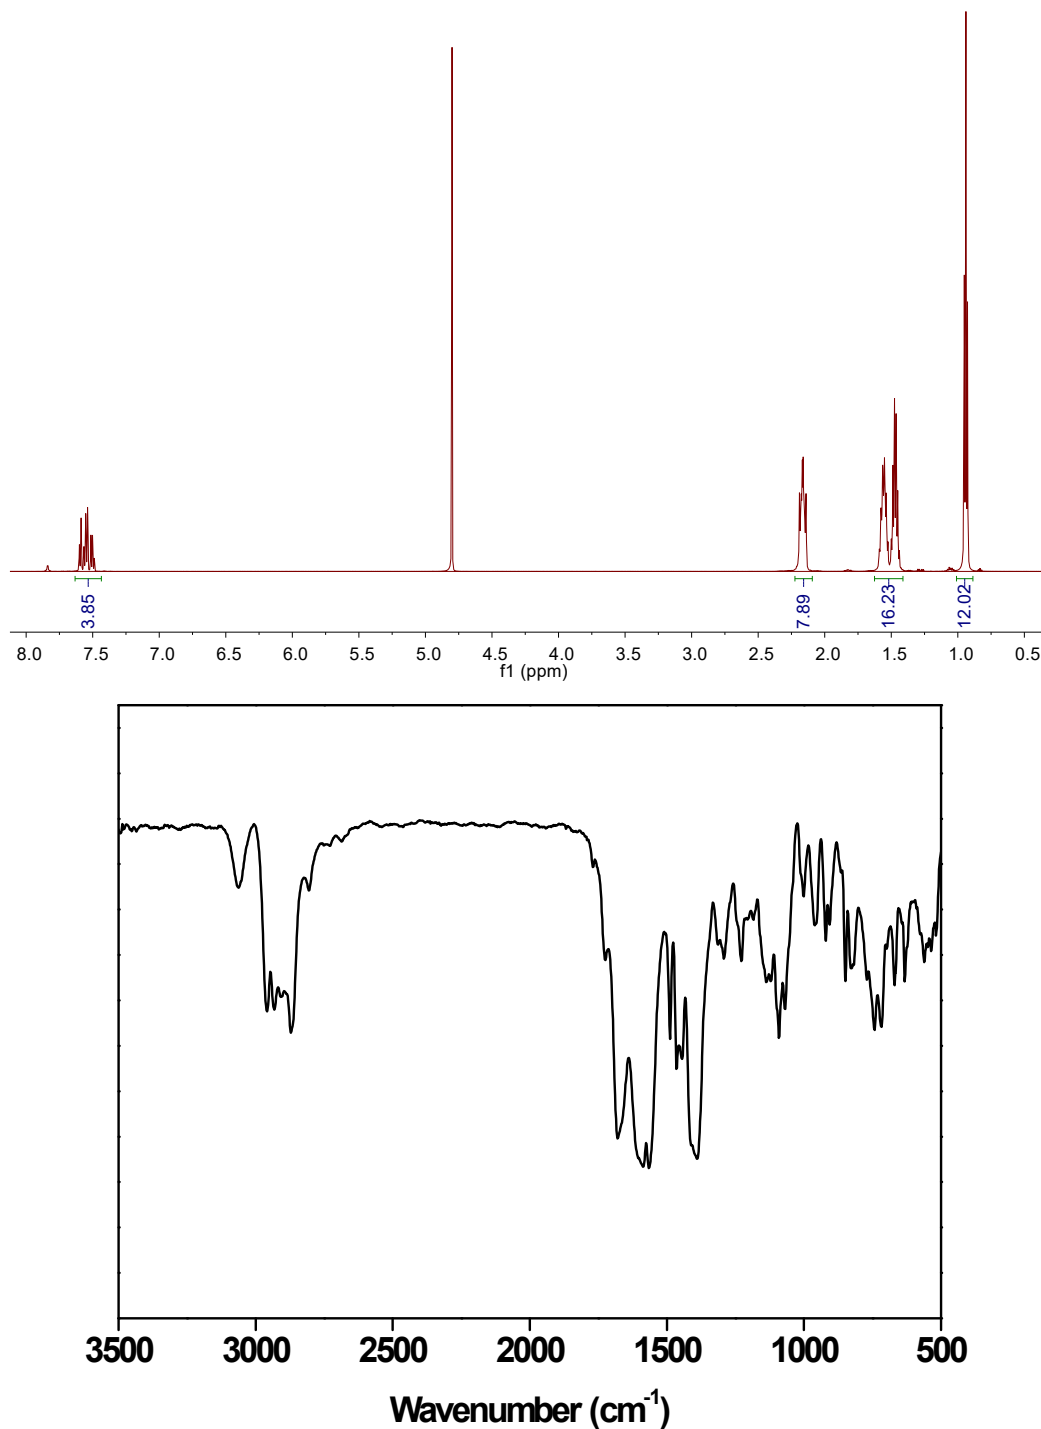

Fig. S5 <sup>1</sup>H NMR and FT-IR spectra of [P<sub>4444</sub>][Phth].

[P<sub>4444</sub>][Heph]: <sup>1</sup>H NMR (600 MHz, D<sub>2</sub>O): 2.75-2.77 (m, 1H), 2.62-2.65 (m, 1H), 2.16-2.21 (m, 8H), 1.69-2.06 (m, 4H), 1.40-1.64 (m, 20H), 0.95 (t, 12H); FT-IR (KBr, cm<sup>-1</sup>): 2960, 2930, 2869, 1665, 1609, 1564, 1467, 1352, 1227, 1140, 1093, 1003, 958, 926, 889, 839, 794, 724, 669, 627, 567, 520.

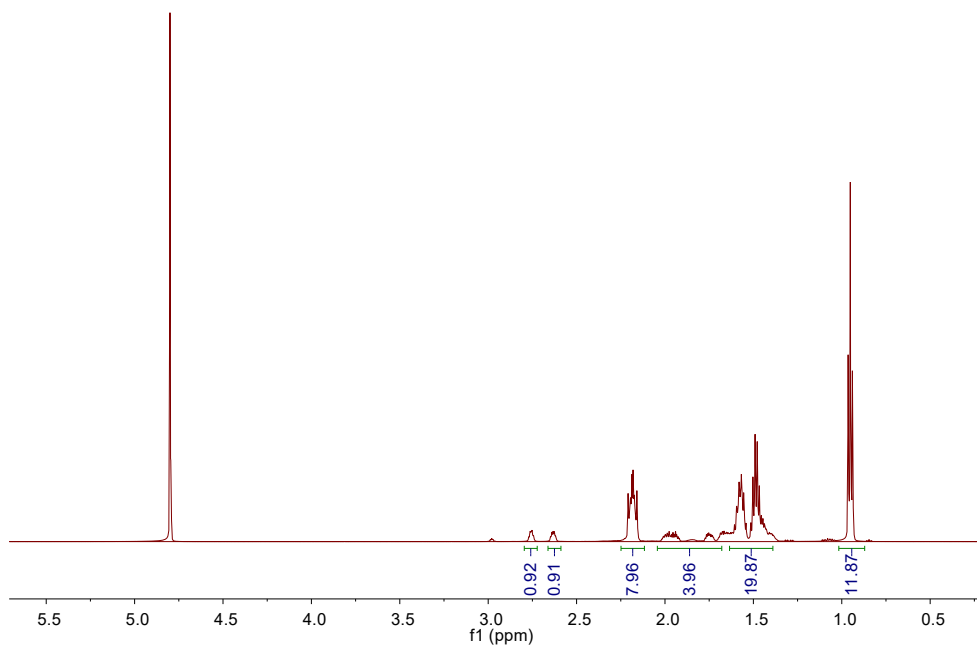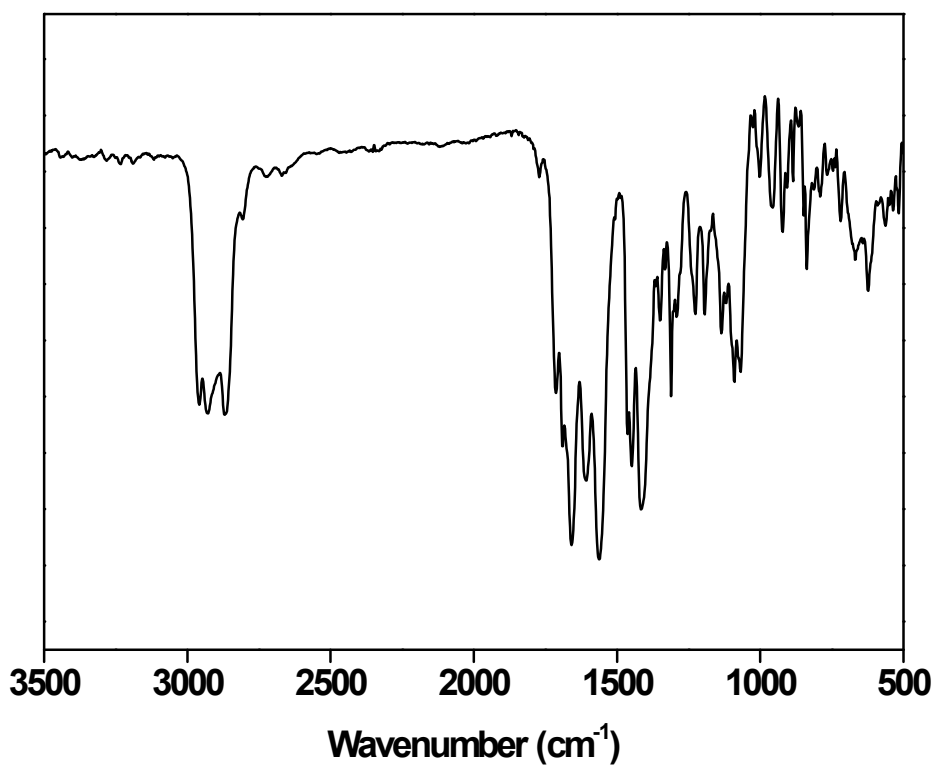

Fig. S6 <sup>1</sup>H NMR and FT-IR spectra of [P<sub>4444</sub>][Heph].

[P<sub>4444</sub>][Teg]: <sup>1</sup>H NMR (600 MHz, D<sub>2</sub>O): 2.40 (s, 2H), 2.32 (s, 2H), 2.16-2.21 (m, 8H), 1.66-1.73 (m, 4H), 1.45-1.61 (m, 20H), 0.95 (t, 12H); FT-IR (KBr, cm<sup>-1</sup>): 2960, 2931, 2871, 1665, 1602, 1564, 1410, 1315, 1230, 1188, 1123, 1093, 1003, 958, 924, 908, 871, 831, 771, 749, 722, 699, 647, 622, 565, 542, 522.

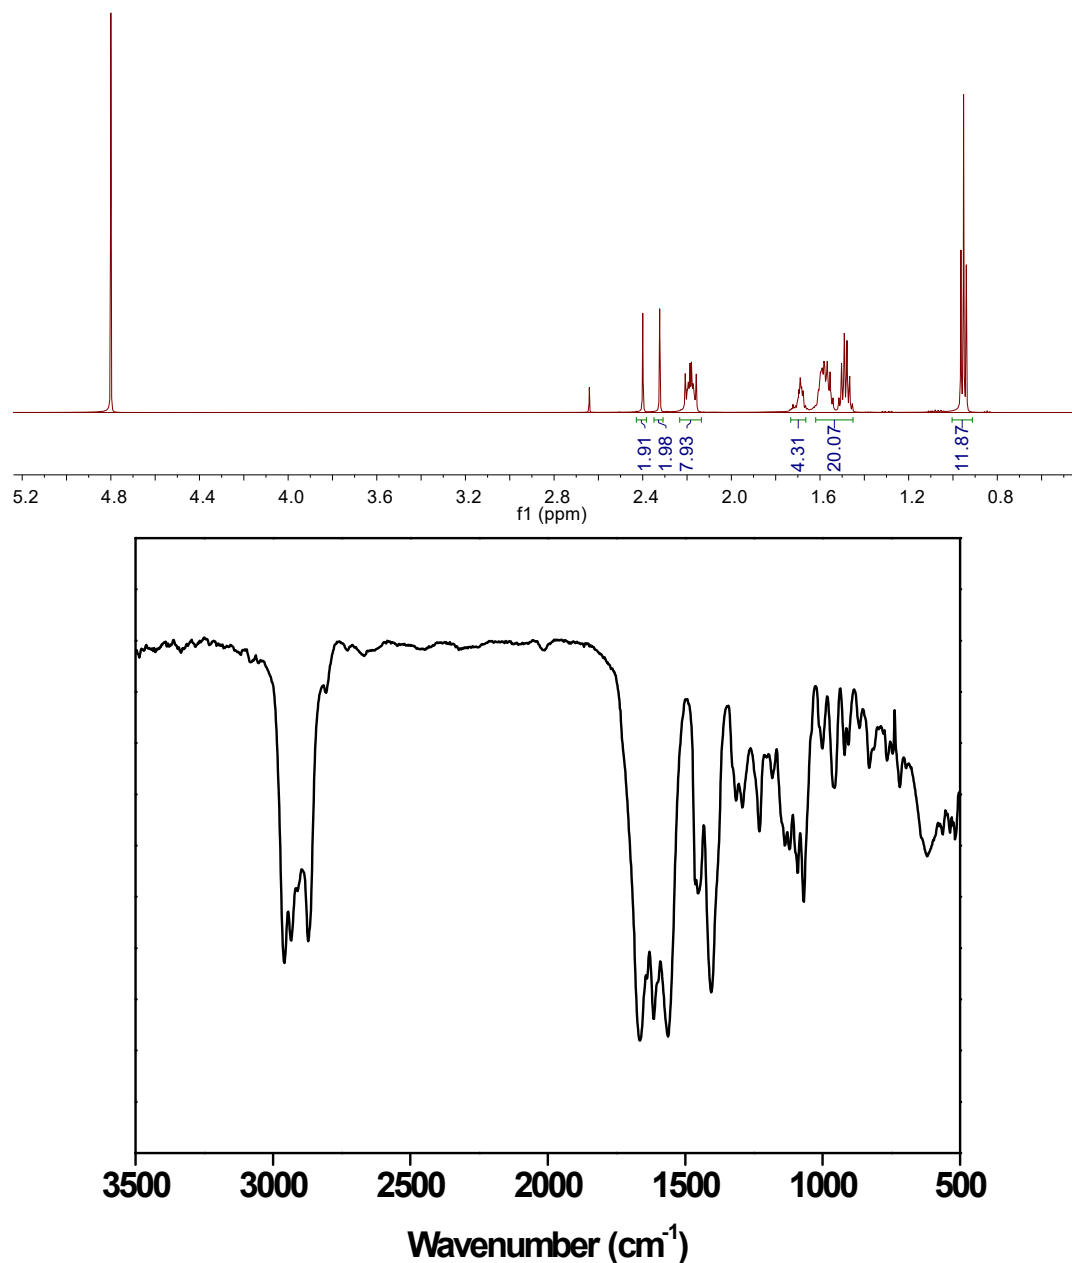

Fig. S7 <sup>1</sup>H NMR and FT-IR spectra of [P<sub>4444</sub>][Teg].

[P<sub>4444</sub>][Cydi]: <sup>1</sup>H NMR (600 MHz, D<sub>2</sub>O): 3.11-3.12 (m, 2H), 2.16-2.21 (m, 8H), 1.90-1.93 (m, 2H), 1.69-1.79 (m, 3H), 1.45-1.60 (m, 16H), 1.17-1.25 (m, 1H), 0.95 (t, 12H); FT-IR (KBr, cm<sup>-1</sup>): 2960, 2931, 2871, 1710, 1602, 1564, 1490, 1450, 1387, 1330, 1233, 1185, 1071, 1000, 956, 869, 829, 799, 769, 747, 719, 699, 646, 624, 564, 540, 522.

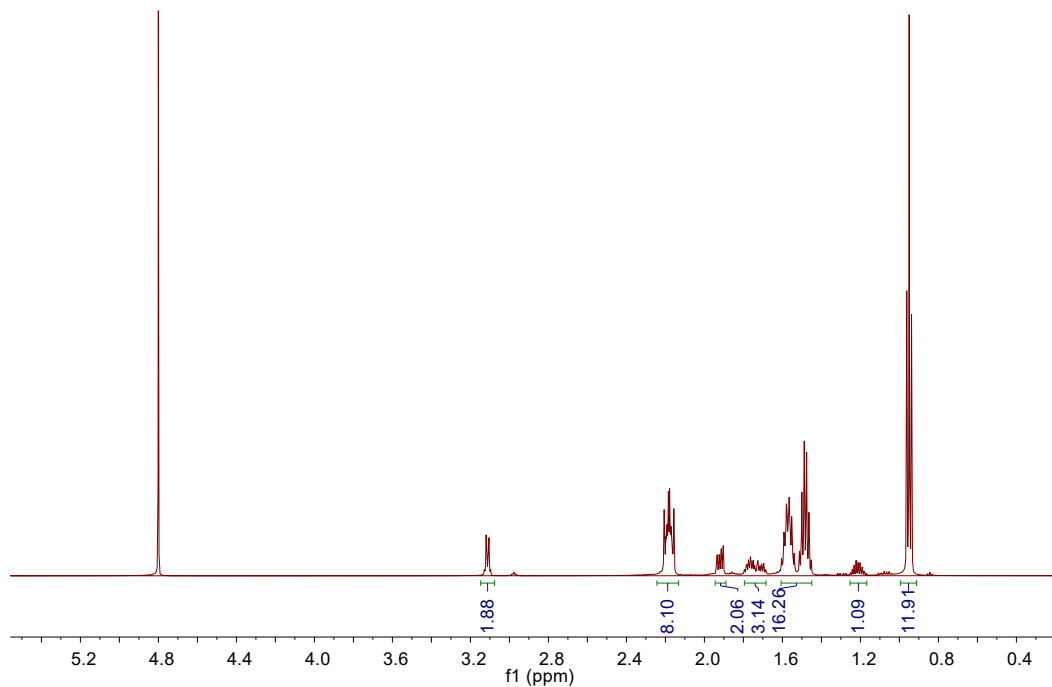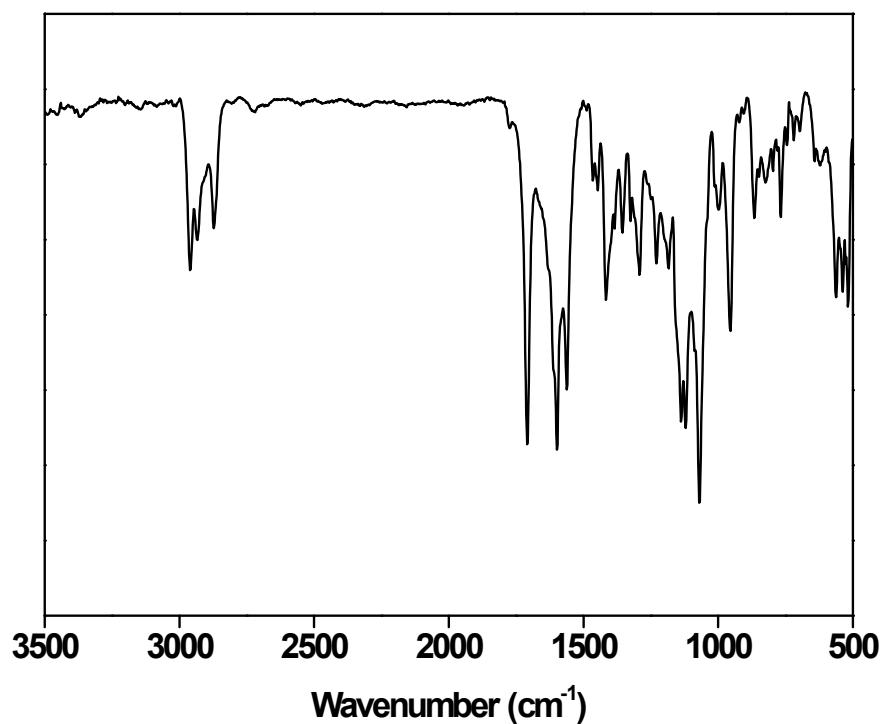

Fig. S8 <sup>1</sup>H NMR and FT-IR spectra of [P<sub>4444</sub>][Cydi].



[P<sub>4444</sub>][Glu]: <sup>1</sup>H NMR (600 MHz, DMSO): 2.17-2.22 (m, 8H), 1.98 (t, 2H), 1.78 (t, 2H), 1.55-1.60 (m, 2H), 1.37-1.49 (m, 16H), 0.91 (t, 12H); FT-IR (KBr, cm<sup>-1</sup>): 2960, 2932, 2872, 1680, 1564, 1462, 1417, 1352, 1225, 1140, 1073, 1001, 958, 924, 869, 831, 771, 724, 699, 562, 540, 520.

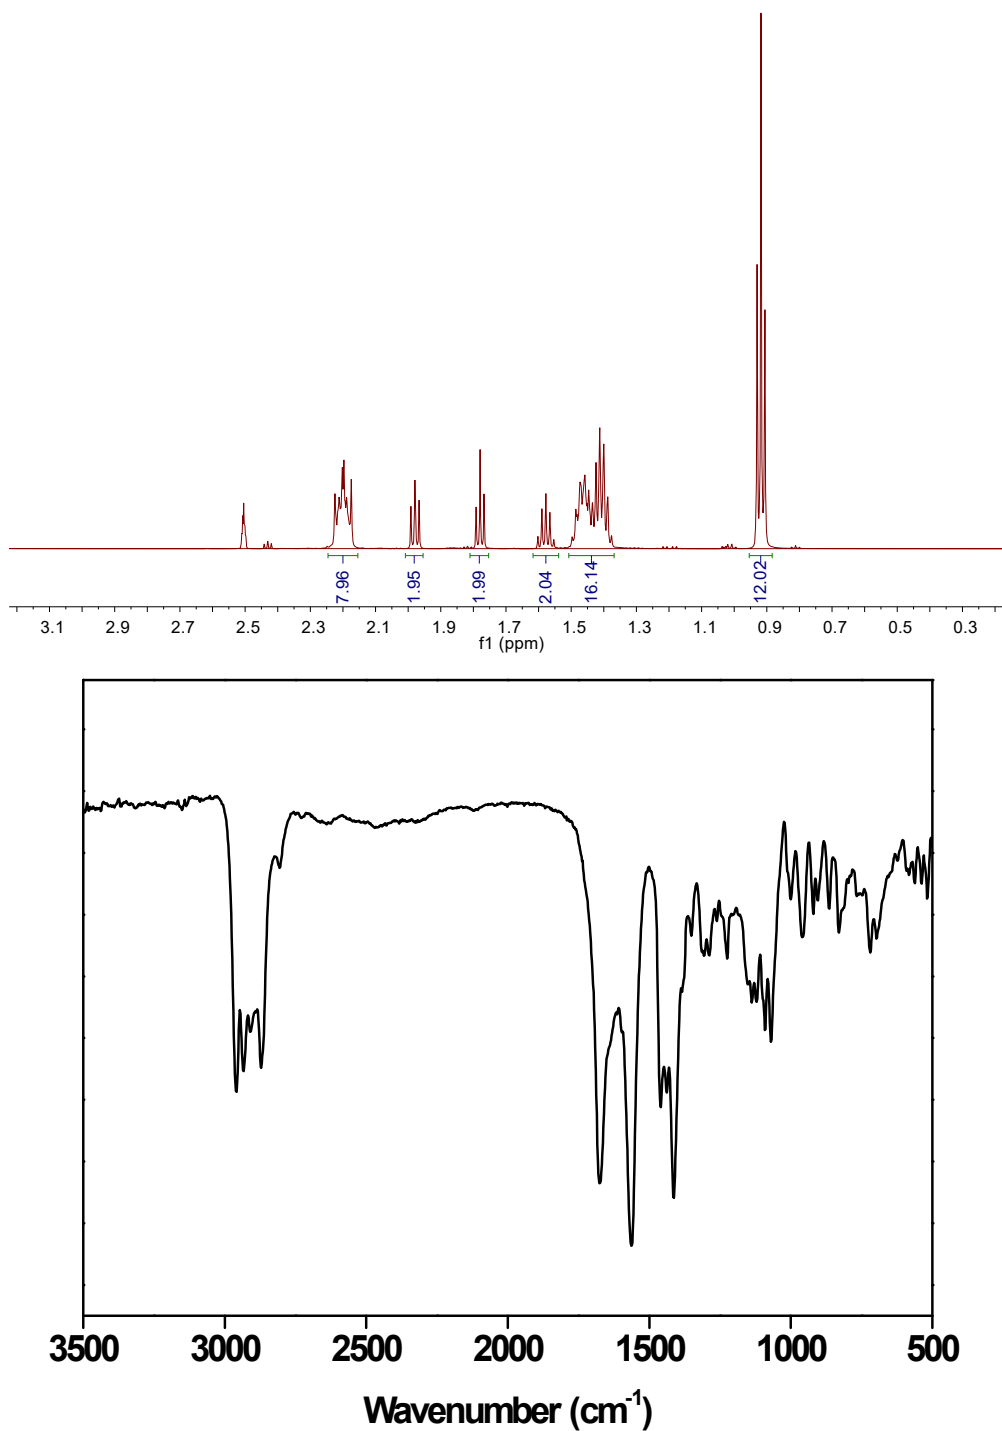

Fig. S9 <sup>1</sup>H NMR and FT-IR spectra of [P<sub>4444</sub>][Glu].

[P<sub>4444</sub>][Suc]: <sup>1</sup>H NMR (600 MHz, DMSO): 2.17-2.22 (m, 8H), 2.09-2.11 (t, 2H), 1.96-1.99 (t, 2H), 1.37-1.49 (m, 16H), 0.92 (t, 12H); FT-IR (KBr, cm<sup>-1</sup>): 2960, 2932, 2872, 1668, 1602, 1569, 1467, 1295, 1185, 1125, 1093, 1003, 958, 924, 909, 873, 831, 769, 739, 722, 699, 647, 567, 539, 520.

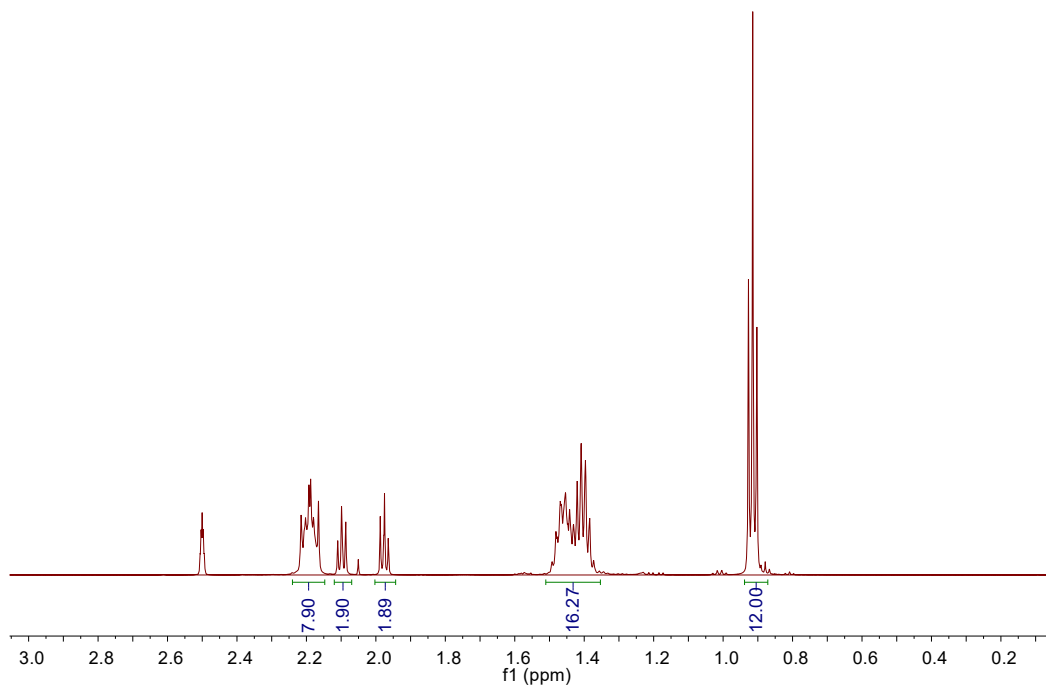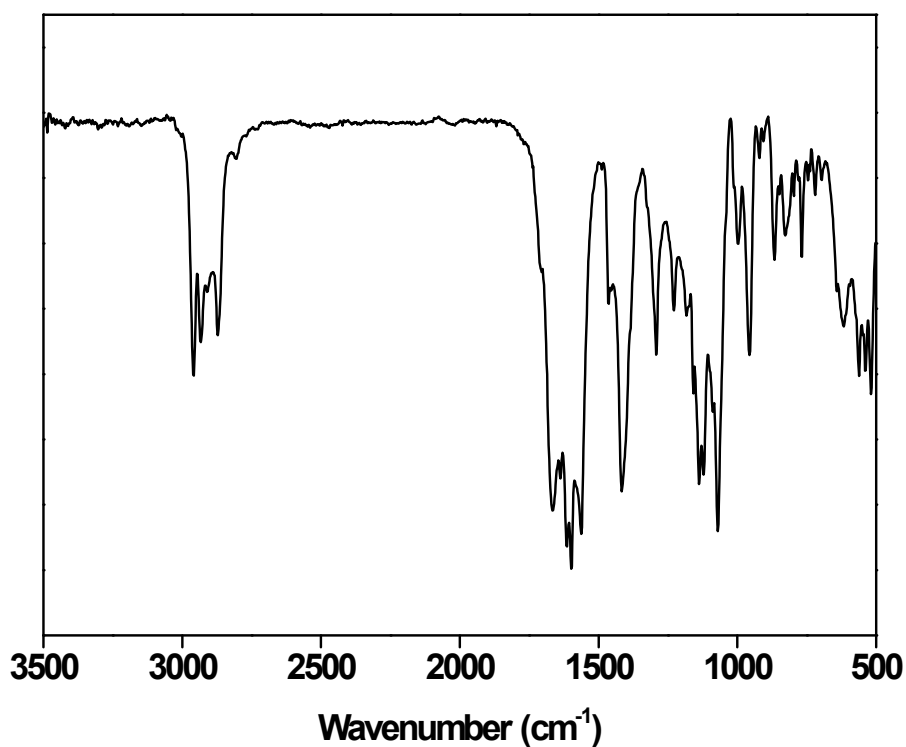

Fig. S10 <sup>1</sup>H NMR and FT-IR spectra of [P<sub>4444</sub>][Suc].

[P<sub>4444</sub>][Naph]: <sup>1</sup>H NMR (600 MHz, DMSO): 8.11 (d, 2H), 8.03 (d, 2H), 7.60 (t, 2H), 2.16-2.21 (m, 8H), 1.36-1.48 (m, 16H), 0.89 (t, 12H); FT-IR (KBr, cm<sup>-1</sup>): 3055, 2960, 2931, 2870, 1683, 1634, 1579, 1539, 1500, 1465, 1437, 1412, 1380, 1337, 1277, 1233, 1208, 1160, 1093, 1071, 1026, 968, 923, 911, 861, 834, 811, 786, 724, 699, 617, 552, 530.

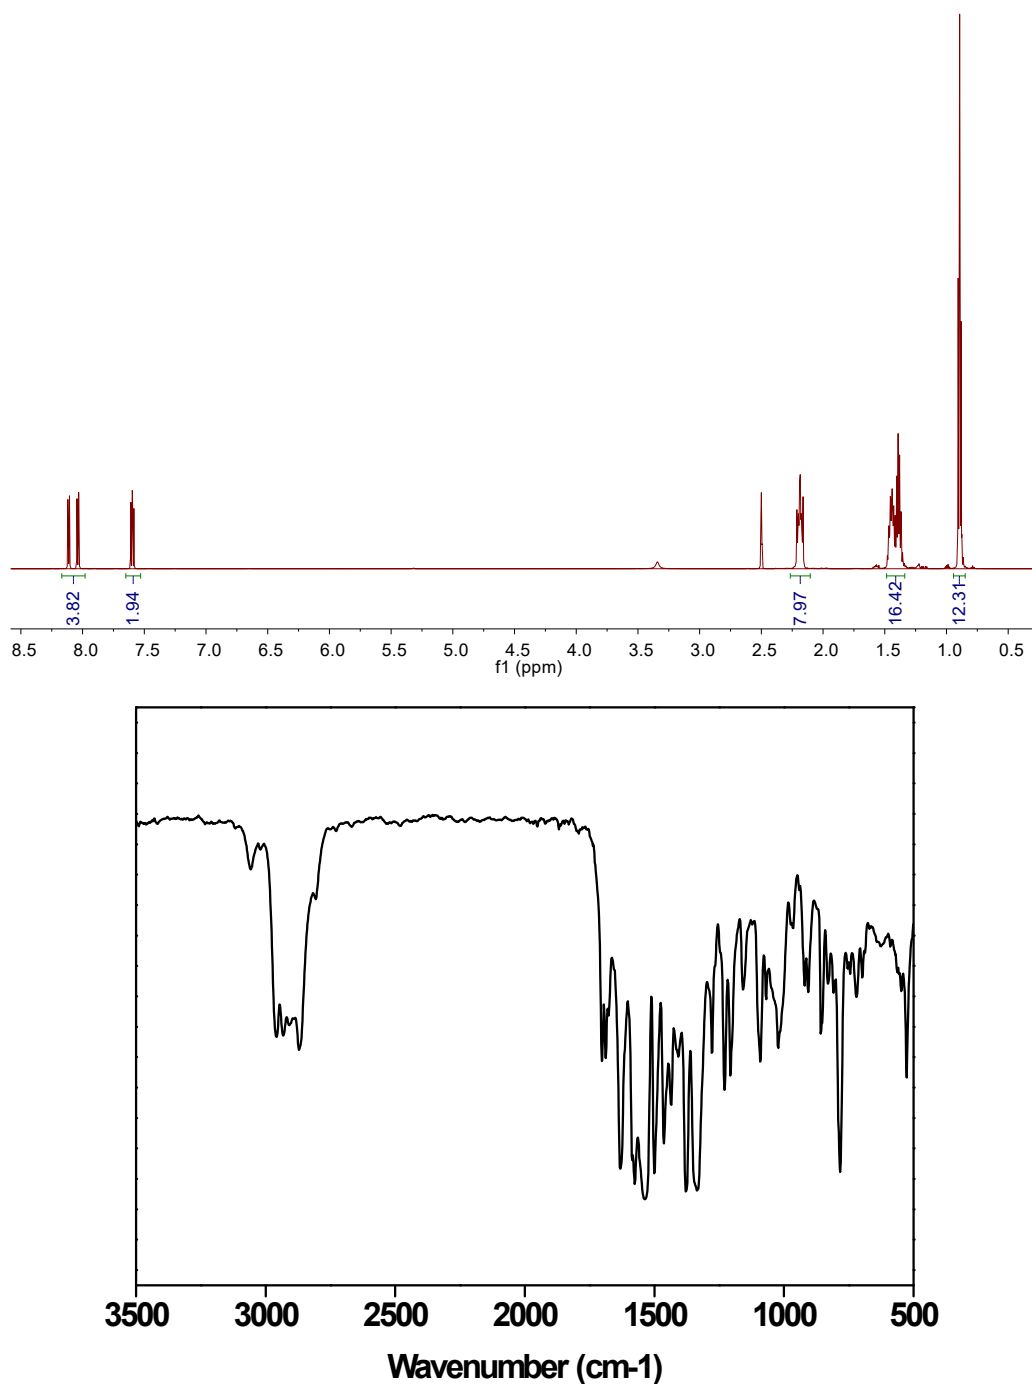

**Fig. S11** <sup>1</sup>H NMR and FT-IR spectra of [P<sub>4444</sub>][Naph].

MC-1:  $^1\text{H}$  NMR (600 MHz,  $\text{CDCl}_3$ ): 2.47 (s, 1H), 3.57 (dd, 1 H), 3.81 (s, 3 H), 3.88 (dd, 1 H), 4.00 (dd, 1 H), 4.12 (d, 1H), 4.30 (q, 1H), 4.53 (d, 1H), 4.64 (t, 1H), 5.13 (d, 1 H);  $^{13}\text{C}$  NMR (600 MHz,  $\text{CDCl}_3$ ): 55.1, 72.3, 73.3, 73.6, 81.6, 82.0, 85.4, 154.7.

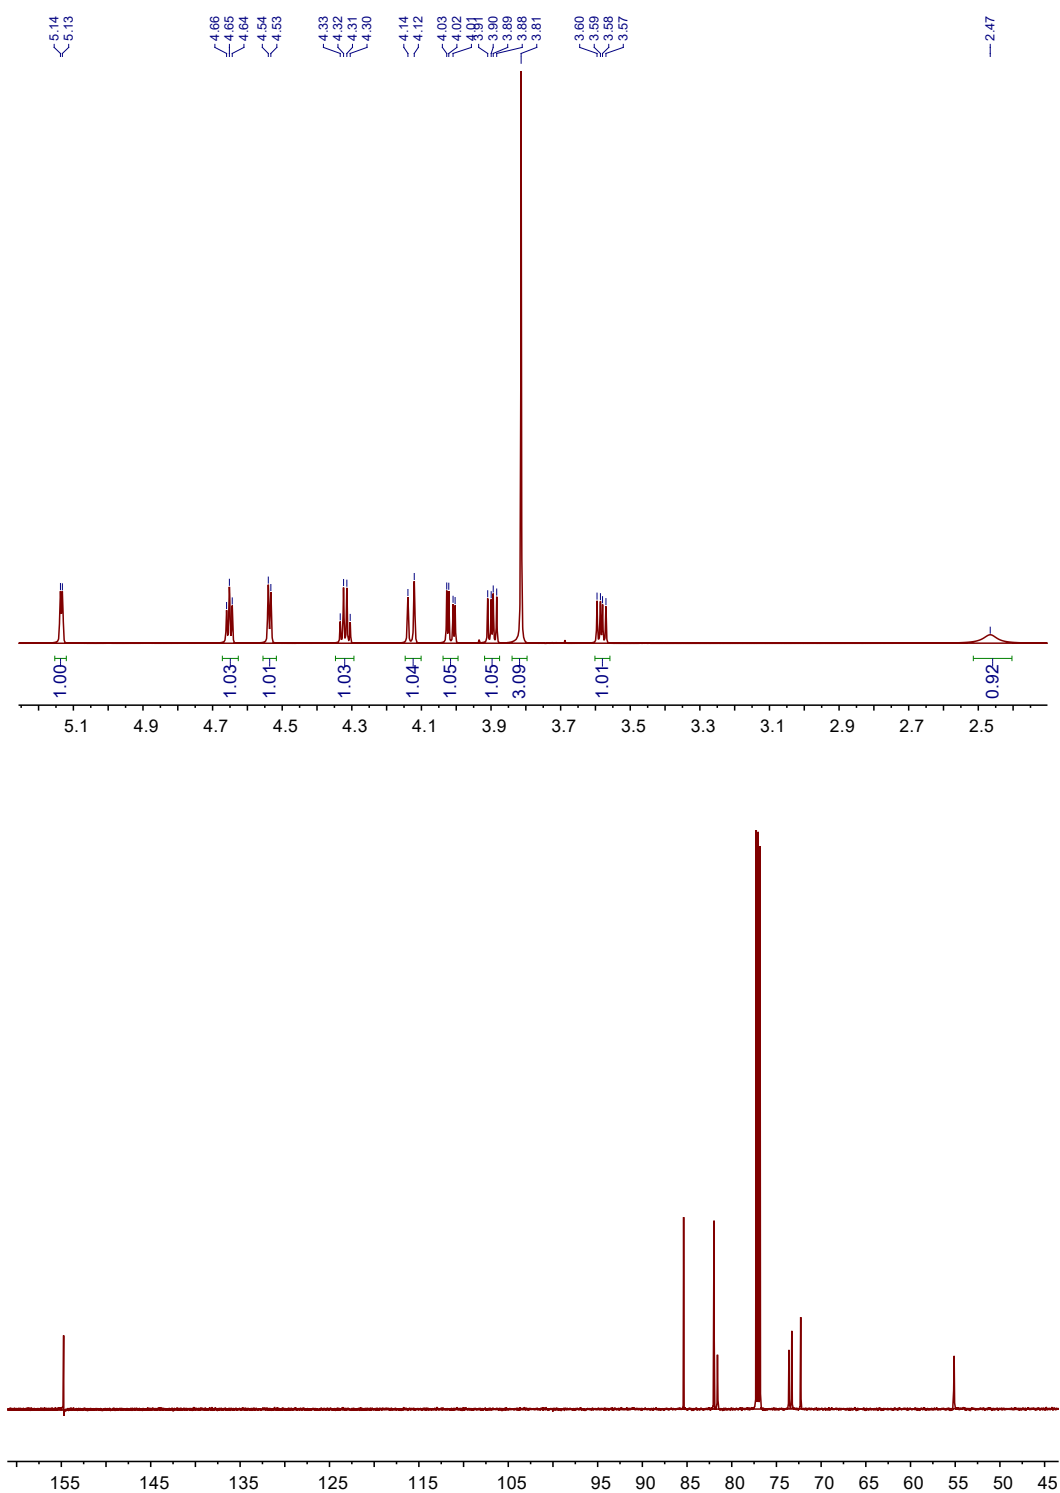

Fig. S12  $^1\text{H}$  NMR and  $^{13}\text{C}$  NMR spectra of MC-1.

MC-2:  $^1\text{H}$  NMR (600 MHz,  $\text{CDCl}_3$ ): 2.12 (s, 1H), 3.82 (s, 3H), 3.85-3.92 (m, 4H), 4.34 (s, 1H), 4.40 (d, 1H), 4.88(t, 1H), 5.05 (q, 1H);  $^{13}\text{C}$  NMR (600 MHz,  $\text{CDCl}_3$ ): 55.3, 70.5, 75.8, 76.3, 77.1, 80.6, 88.5, 155.4.

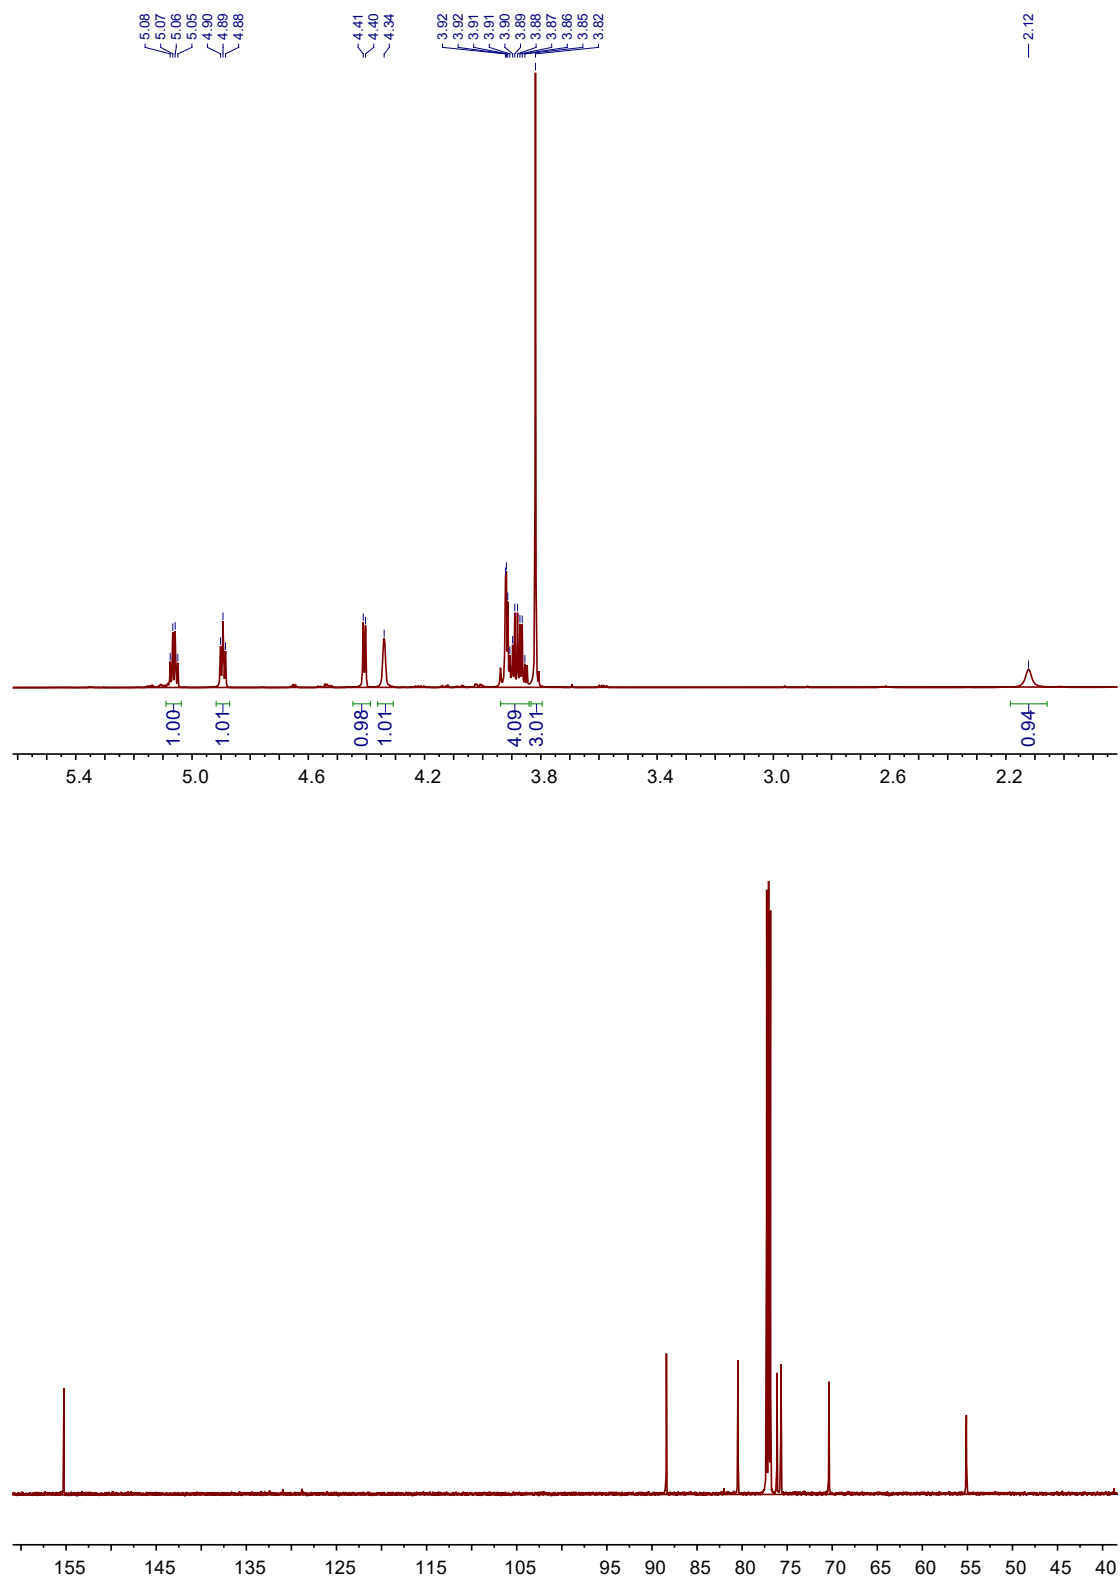

**Fig. S13**  $^1\text{H}$  NMR and  $^{13}\text{C}$  NMR spectra of MC-2.

DC:  $^1\text{H}$  NMR (600 MHz,  $\text{CDCl}_3$ ): 3.81 (s, 3H), 3.82 (s, 3H), 3.88-3.94 (m, 2H), 4.01 (dd, 1 H), 4.07 (d, 1H), 4.54 (d, 1H), 4.88 (t, 1 H), 5.05-5.11 (m, 2 H);  $^{13}\text{C}$  NMR (600 MHz,  $\text{CDCl}_3$ ): 55.3, 70.6, 73.4, 76.9, 81.0, 81.4, 86.0, 154.9, 155.3.

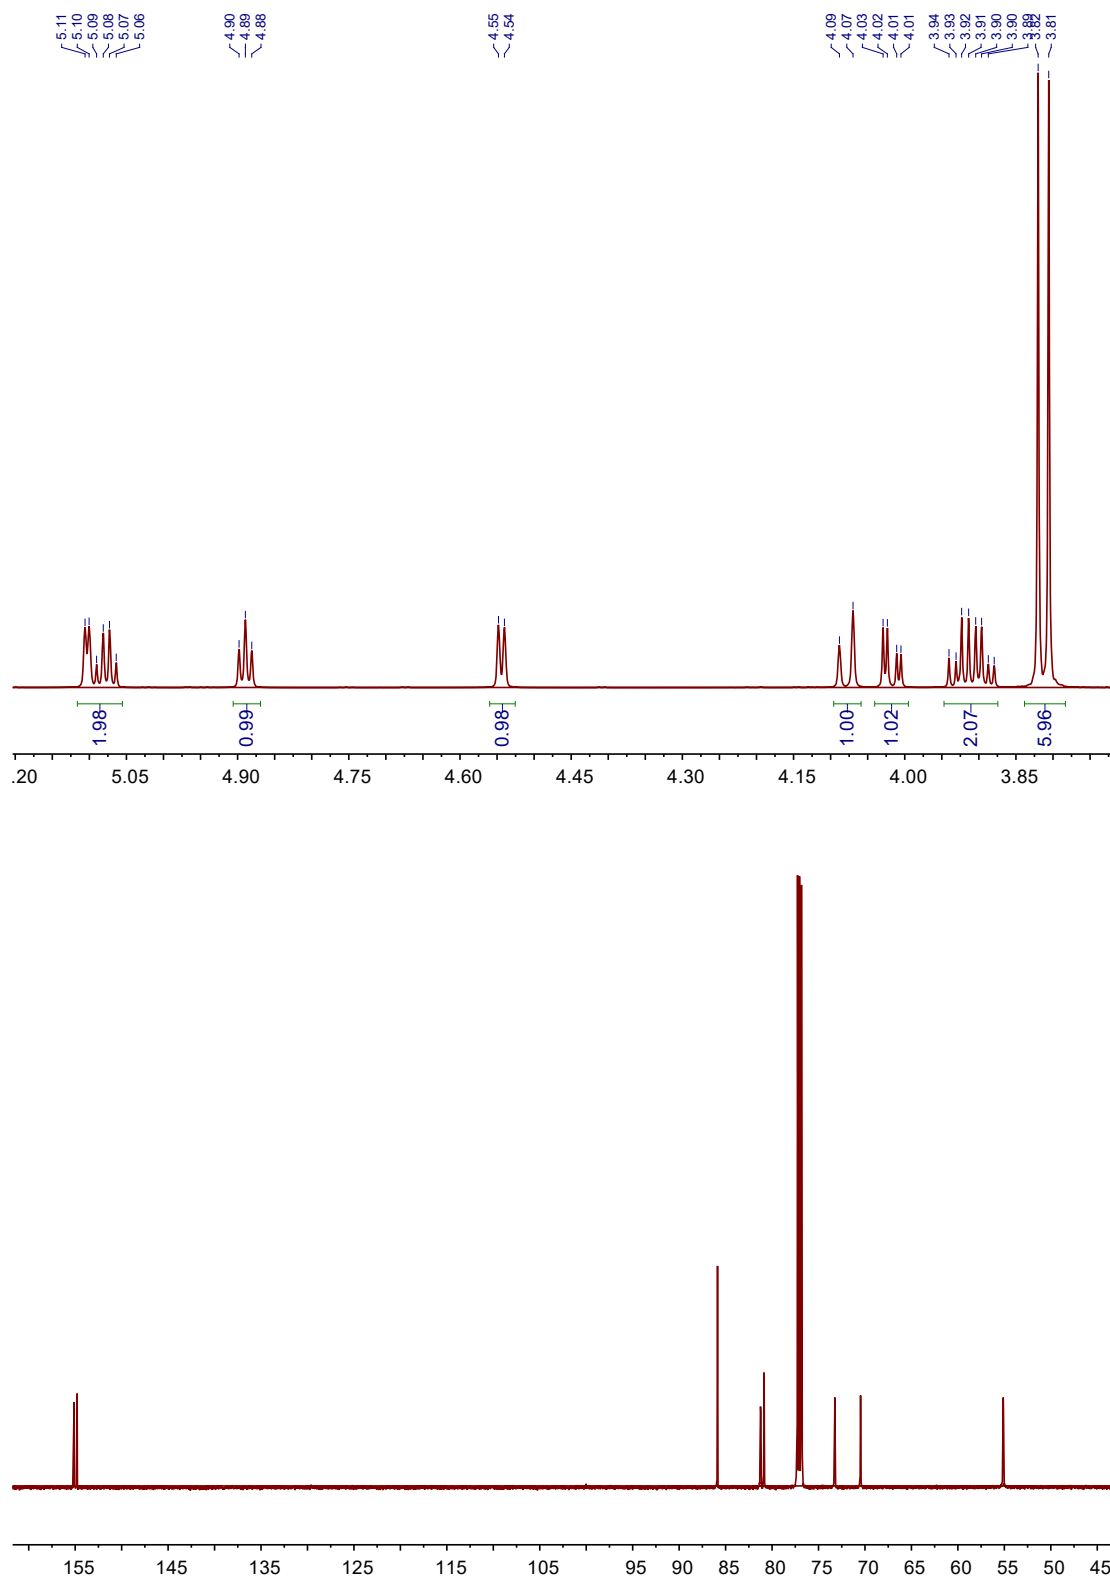

**Fig. S14**  $^1\text{H}$  NMR and  $^{13}\text{C}$  NMR spectra of DC.
